# Supplementary material for: [N(CH3)4][(UO2)2F5]: A new organically templated open-framework uranium oxide fluoride (MUF-2)
Source: Royal Society of Chemistry journal article supplement (doi:10.1039/b609525a), 2006-01-01
Supplement: b609525a.pdf [file b609525a.pdf]

Supporting Information for:

**[N(CH<sub>3</sub>)<sub>4</sub>][(UO<sub>2</sub>)<sub>2</sub>F<sub>5</sub>]: A New Organically Templated Open-Framework Uranium Oxide Fluoride (MUF-2)**

*Kang Min Ok, Michael B. Doran, and Dermot O'Hare\**

Chemistry Research Laboratory, University of Oxford, Oxford OX1 3TA, United Kingdom.

S1. Calculated and observed powder X-ray diffraction pattern for [N(CH<sub>3</sub>)<sub>4</sub>][(UO<sub>2</sub>)<sub>2</sub>F<sub>5</sub>]

S2. Crystallographic data for [N(CH<sub>3</sub>)<sub>4</sub>][(UO<sub>2</sub>)<sub>2</sub>F<sub>5</sub>] and [N(CH<sub>3</sub>)<sub>4</sub>][(UO<sub>2</sub>)(NO<sub>3</sub>)<sub>3</sub>]

S3. Six-membered Ring (6-MR) Channels in [N(CH<sub>3</sub>)<sub>4</sub>][(UO<sub>2</sub>)<sub>2</sub>F<sub>5</sub>] along the (a) [100] and (b) [311] directions

S4. (a) Ball-and-stick representation in the bc-plane and (b) thermal ellipsoid view (50% probability) of zero-dimensional [N(CH<sub>3</sub>)<sub>4</sub>][(UO<sub>2</sub>)(NO<sub>3</sub>)<sub>3</sub>]

S5. Selected bond distances (Å) for [N(CH<sub>3</sub>)<sub>4</sub>][(UO<sub>2</sub>)<sub>2</sub>F<sub>5</sub>] and [N(CH<sub>3</sub>)<sub>4</sub>][(UO<sub>2</sub>)(NO<sub>3</sub>)<sub>3</sub>]

S1. Calculated and observed powder X-ray diffraction pattern for  $[\text{N}(\text{CH}_3)_4][(\text{UO}_2)_2\text{F}_5]$

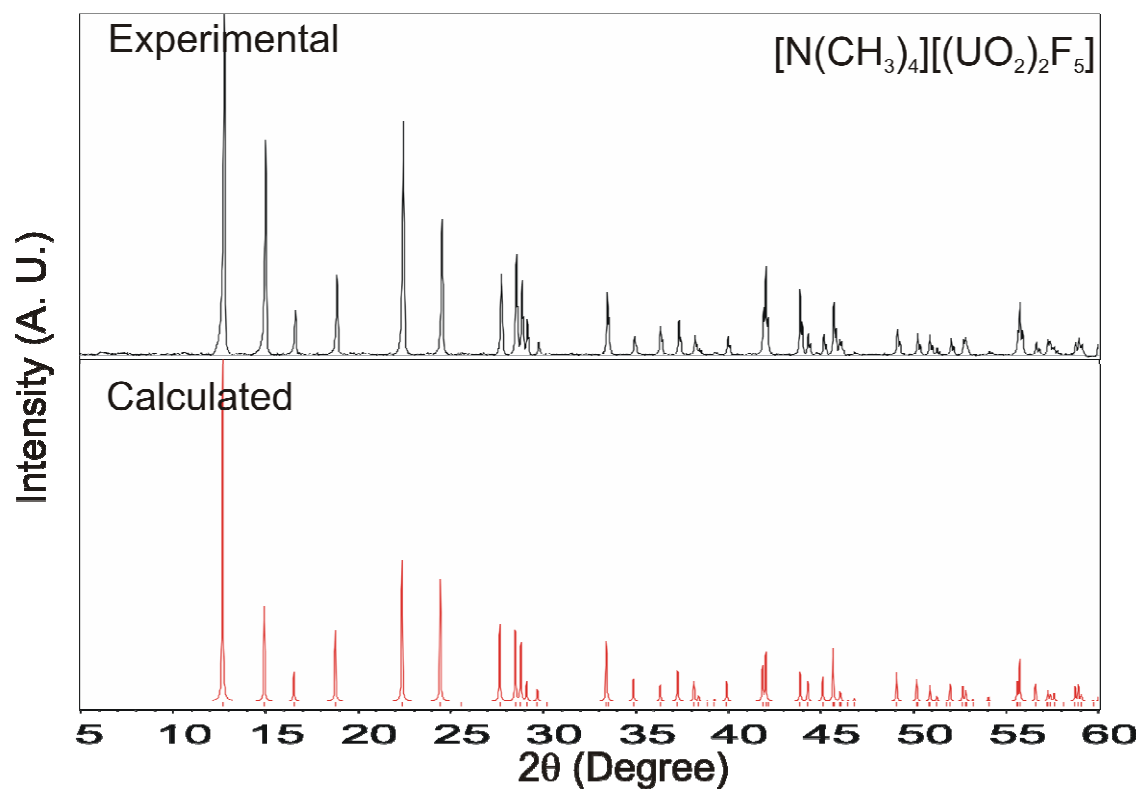

22 S2. Crystallographic data for  $[\text{N}(\text{CH}_3)_4][(\text{UO}_2)_2\text{F}_5]$  and  $[\text{N}(\text{CH}_3)_4][(\text{UO}_2)(\text{NO}_3)_3]$

|                                              |                                                        |                                                           |
|----------------------------------------------|--------------------------------------------------------|-----------------------------------------------------------|
| formula                                      | $[\text{N}(\text{CH}_3)_4][(\text{UO}_2)_2\text{F}_5]$ | $[\text{N}(\text{CH}_3)_4][(\text{UO}_2)(\text{NO}_3)_3]$ |
| fw                                           | 710.21                                                 | 530.21                                                    |
| crystal dimensions ( $\text{mm}^3$ )         | $0.10 \times 0.10 \times 0.24$                         | $0.06 \times 0.08 \times 0.12$                            |
| color, habit                                 | yellow, block                                          | yellow, block                                             |
| crystal system                               | tetragonal                                             | monoclinic                                                |
| space group                                  | $I4_1/amd$ (No. 141)                                   | $P2_1/c$ (No. 14)                                         |
| $a$ (Å)                                      | 7.2721(10)                                             | 7.7670(16)                                                |
| $b$                                          | 7.2721(10)                                             | 16.964(3)                                                 |
| $c$                                          | 23.632(5)                                              | 11.255(2)                                                 |
| $\beta$ (°)                                  | 90                                                     | 105.98(3)                                                 |
| $V$ (Å <sup>3</sup> )                        | 1249.7(4)                                              | 1425.7(5)                                                 |
| $Z$                                          | 4                                                      | 4                                                         |
| $T$ (°C)                                     | 150.0(2)                                               | 150.0(2)                                                  |
| $\lambda$ (Å)                                | 0.71073                                                | 0.71073                                                   |
| $\rho_{\text{calcd}}$ ( $\text{g cm}^{-3}$ ) | 3.770                                                  | 2.470                                                     |
| $\mu$ ( $\text{mm}^{-1}$ )                   | 25.945                                                 | 11.444                                                    |
| $2\theta_{\text{max}}$ (deg)                 | 54.94                                                  | 54.96                                                     |
| no. of refln collected/unique                | 1259/418                                               | 5971/3221                                                 |
| absorption correction                        | multi-scan                                             | multi-scan                                                |
| GOF                                          | 1.007                                                  | 0.89                                                      |
| $R(F)^a$                                     | 0.0209                                                 | 0.0296                                                    |
| $R_w(F_o^2)^b$                               | 0.0436                                                 | 0.0585                                                    |

23

24  $^a R(F) = \Sigma ||F_o| - |F_c|| / \Sigma |F_o|.$

25  $^b R_w(F_o^2) = [\Sigma w(F_o^2 - F_c^2)^2 / \Sigma w(F_o^2)^2]^{1/2}.$

26

27

28

29

S3. Six-membered Ring (6-MR) Channels in  $[\text{N}(\text{CH}_3)_4][(\text{UO}_2)_2\text{F}_5]$  along the (a)  $[100]$  and (b)  $[311]$  directions

30

(a)

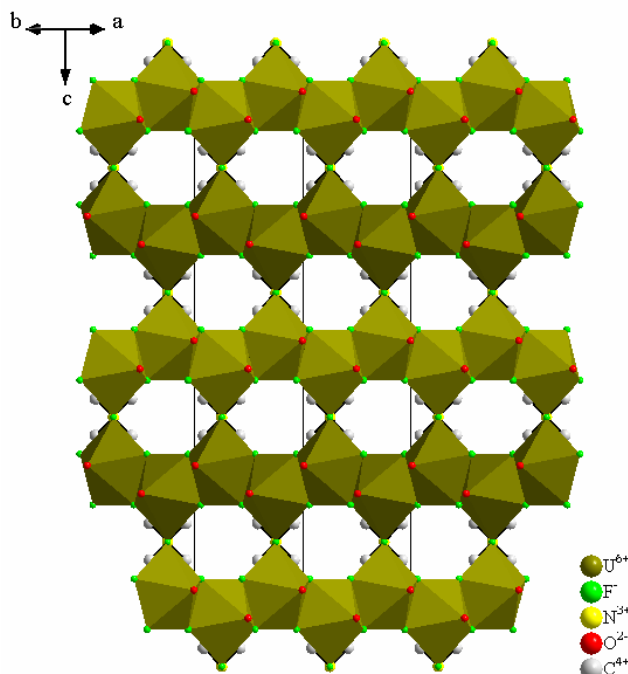

31

32

(b)

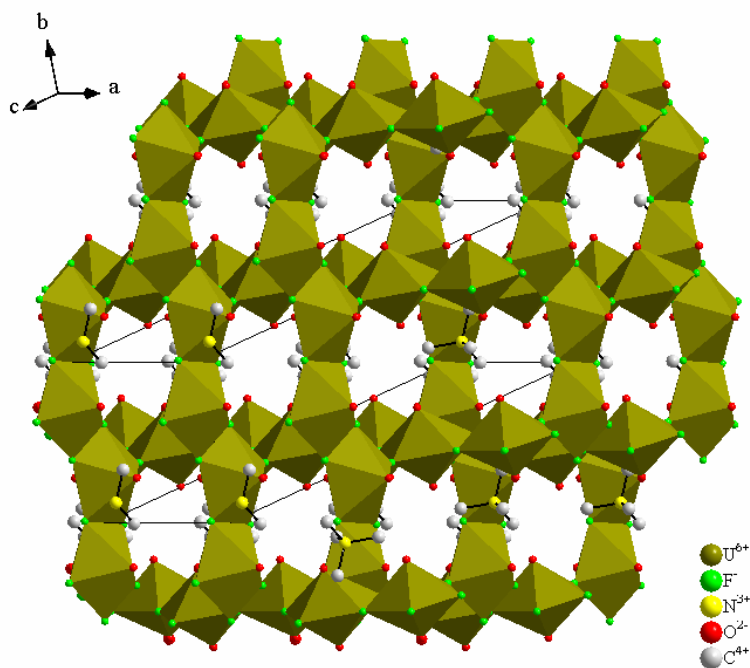

33

S4. (a) Ball-and-stick representation in the *bc*-plane and (b) thermal ellipsoid view (50% probability) of zero-dimensional  $[\text{N}(\text{CH}_3)_4][(\text{UO}_2)(\text{NO}_3)_3]$

(a)

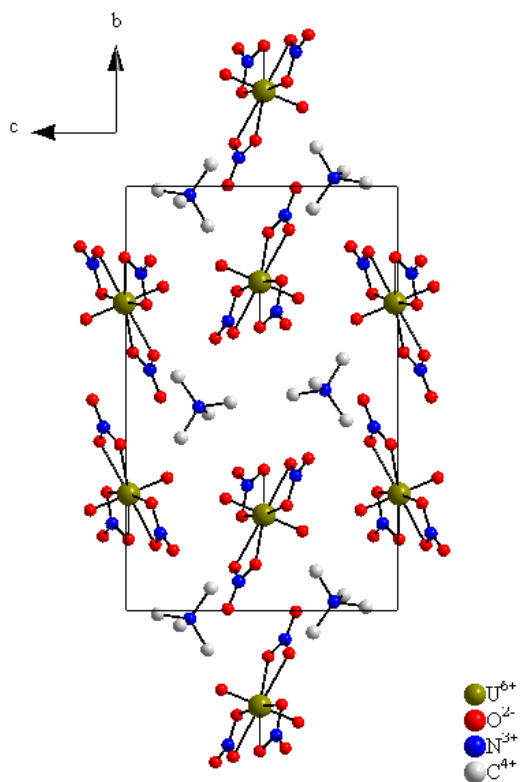

(b)

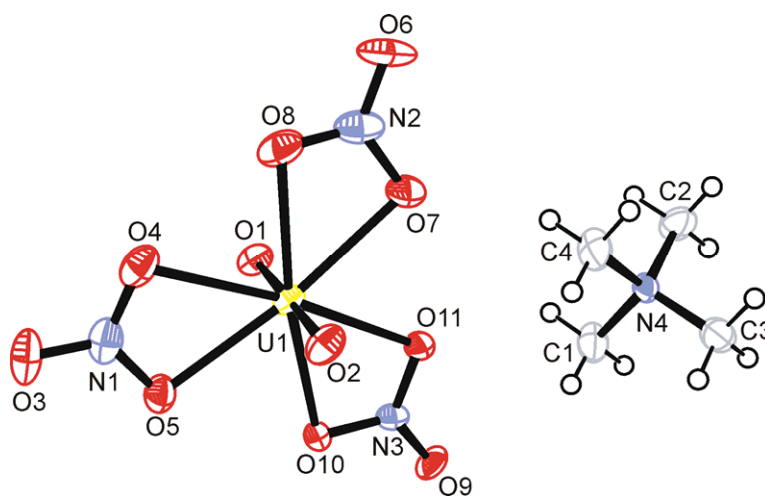

45 S5. Selected bond distances (Å) for  $[\text{N}(\text{CH}_3)_4][(\text{UO}_2)_2\text{F}_5]$  and  $[\text{N}(\text{CH}_3)_4][(\text{UO}_2)(\text{NO}_3)_3]$

46

47  $[\text{N}(\text{CH}_3)_4][(\text{UO}_2)_2\text{F}_5]$

48 U(1)–O(1) × 2 1.769(5)

49 U(1)–F(1) × 2 2.323(4)

50 U(1)–F(1) × 2 2.327(4)

51 U(1)–F(2) 2.2803(6)

52 N(1)–C(1) × 4 1.491(9)

53

54  $[\text{N}(\text{CH}_3)_4][(\text{UO}_2)(\text{NO}_3)_3]$

55 U(1)–O(1) 1.760(4)

56 U(1)–O(2) 1.758(4)

57 U(1)–O(4) 2.469(4)

58 U(1)–O(5) 2.460(4)

59 U(1)–O(7) 2.468(4)

60 U(1)–O(8) 2.448(4)

61 U(1)–O(10) 2.481(4)

62 U(1)–O(11) 2.475(3)

63 N(1)–O(3) 1.212(5)

64 N(1)–O(4) 1.291(6)

65 N(1)–O(5) 1.265(6)

66 N(2)–O(6) 1.204(6)

67 N(2)–O(7) 1.286(6)

68 N(2)–O(8) 1.289(6)

69 N(3)–O(9) 1.211(5)

70 N(3)–O(10) 1.298(5)

71 N(3)–O(11) 1.274(5)

72 N(4)–C(1) 1.495(7)

73 N(4)–C(2) 1.501(6)

74 N(4)–C(3) 1.491(7)

75 N(4)–C(4) 1.490(7)

76

77
